# Supplementary material for: Prevalence of Asymptomatic non-Falciparum and Falciparum Malaria in the 2014–15 Rwanda Demographic Health Survey
Source: PubMed Central journal article supplement — medRxiv. 2025 Jul 20:2024.01.09.24301054. Originally published 2024 Jan 10. Preprint. [Version 3] doi: 10.1101/2024.01.09.24301054 (PMC10802648; doi:10.1101/2024.01.09.24301054), 2025-07-20
Supplement: media-1.pdf [file media-1.pdf]

## Supplemental Material for:

### Prevalence of Falciparum and non-Falciparum Malaria in the 2014-15 Rwanda Demographic Health Survey

Claudia Gaither<sup>1</sup>, Camille Morgan<sup>2</sup>, Rebecca Kirby<sup>3</sup>, Corine Karema<sup>4</sup>, Pierre Gashema<sup>5</sup>, Sam White<sup>1</sup>, Hillary Topazian<sup>6</sup>, David Geibrecht<sup>3</sup>, Kyaw Thwai<sup>1</sup>, Koby Boyter<sup>1</sup>, Tharcisse Munyaneza<sup>7</sup>, Claude Mambo<sup>8</sup>, Jean De Dieu Butera<sup>7</sup>, Jeffrey A. Bailey<sup>3\*</sup>, Jean-Baptiste Mazarati<sup>4,5\*</sup>, Jonathan J. Juliano<sup>1,2,9,10\*#</sup>

1: Institute for Global Health and Infectious Diseases, University of North Carolina, Chapel Hill, NC, USA

2: Department of Epidemiology, Gillings School of Global Public Health, University of North Carolina, Chapel Hill, NC, USA

3: Department of Pathology, Brown University, Providence, RI, USA

4: Quality Equity Health Care, Kigali, Rwanda

5: INES-Ruhengeri, Ruhengeri, Rwanda

6: Imperial College, London, UK

7: National Reference Laboratory, Rwanda Biomedical Center, Kigali, Rwanda

8: Rwanda Biomedical Centre, Kigali, Rwanda

9: Division of Infectious Diseases, School of Medicine, University of North Carolina, Chapel Hill, NC, USA

10: Curriculum in Genetics and Molecular Biology, School of Medicine, University of North Carolina, Chapel Hill, NC, USA

**Supplemental Figure 1. Distribution of clusters where malaria species were Identified.** Panel A, B, C and D represent clusters where falciparum, malariae, ovale spp, and vivax malaria were identified, respectively. Mixed infections are denoted.

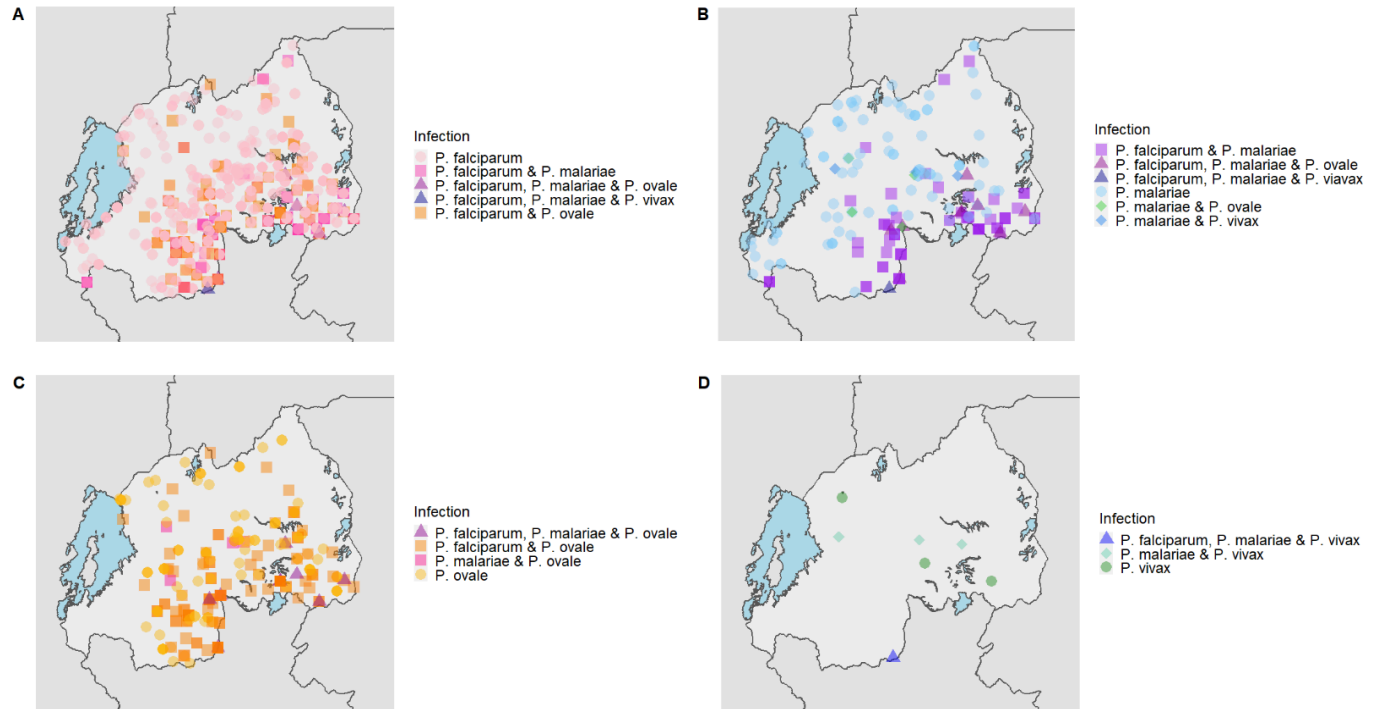

## Supplemental Table 1. PCR Primers, Probes and Reaction Condition

### *Plasmodium falciparum (varATS)*

Adapted from: Hoffman, N, et. al. PLOS Medicine. 2015.

Forward Primer 5' - CCCATACACAACCAAYTGGG - 3'

Reverse Primer 5' - TTCGCACATATCTCTATGTCTATCT - 3'

Probe 5' - 6-FAM-TRTCCATAAAATGGT-NFQ-MGB - 3'

| Cycling conditions     |  | 45 cycles |        |      |       |
|------------------------|--|-----------|--------|------|-------|
| temp (degrees Celsius) |  | 50        | 95     | 95   | 55    |
| time                   |  | 2 min     | 10 min | 15 s | 1 min |

Roche FastStart Universal Probe Master

Fwd primer 800 nM

Rev primer 800 nM

Probe 400 nM

Template DNA 2.5 µl

Total volume 12.5 µl

### *Plasmodium ovale (18s)*

Adapted from: Mitchell C, et. al. Journal of Infectious Diseases. 2021

Forward Primer 5' - CCRACTAGGTTTTGGATGAAVTTTTT - 3'

Reverse Primer 5' - AACCCAAAGACTTTGATTTCTCATAA - 3'

Probe 5' - VIC/CRAAAGGAATYTTCTTATT - 3'

| Cycling conditions     |  | 45 cycles |        |      |       |
|------------------------|--|-----------|--------|------|-------|
| temp (degrees Celsius) |  | 50        | 95     | 95   | 52    |
| time                   |  | 2 min     | 10 min | 15 s | 1 min |

Roche FastStart Universal Probe Master (Rox)

Fwd primer 400 nM

Rev primer 400 nM

Probe 200 nM

Template DNA 2 µl

Total volume 12 µl

### *Plasmodium malariae (18s)*

Rougemont M, et. al. Journal of Clinical Microbiology. 2004.

5' - AGTTAAGGGAGTGAAGACGATCAGA - 3'

5' - CAACCCAAAGACTTTGATTTCTCATAA - 3'

5' - 6-FAM-ATGAGTGTTCCTTTTAGATAGC-NFQ-MGB - 3'

| Cycling conditions     |  | 45 cycles |        |      |       |
|------------------------|--|-----------|--------|------|-------|
| temp (degrees Celsius) |  | 50        | 95     | 95   | 60    |
| time                   |  | 2 min     | 10 min | 15 s | 1 min |

Roche FastStart Universal Probe Master

Fwd primer 300 nM

Rev primer 300 nM

Probe 400 nM

Template DNA 2 µl

Total volume 12.5 µl

### *Plasmodium vivax (18s)*

Brazeau N, et. al. Nature Communications. 2021

5' - ACGCTTCTAGCTTAATCCACATAACT - 3'

5' - ATTTACTCAAAGTAACAAGGACTTCCAAGC - 3'

5' - /56-FAM/TTCGTATCG/ZEN/ACTTTGTGCGCATTTTGC/3IABkFQ/ - 3'

| Cycling conditions     |  | 45 cycles |        |      |       |
|------------------------|--|-----------|--------|------|-------|
| temp (degrees Celsius) |  | 50        | 95     | 95   | 60    |
| time                   |  | 2 min     | 10 min | 15 s | 1 min |

Roche FastStart Universal Probe Master (Rox)

Fwd primer 400 nM

Rev primer 400 nM

Probe 200 nM

Template DNA 5 µl

Total volume 18 µl

**Supplemental Table 2. Comparison of Population Used for Molecular Screening to Overall DHS Population (weighted counts)**

***Individual Level Covariates***

| Variable                                      |                        | This Study | %      | Overall DHS | %      |
|-----------------------------------------------|------------------------|------------|--------|-------------|--------|
| <i>Sex of respondent</i>                      | Male                   | 2755       | 59.69% | 8490        | 63.61% |
|                                               | Female                 | 1861       | 40.31% | 4858        | 36.39% |
| <i>Age group (years)</i>                      | 0-15                   | 121        | 2.63%  | 255         | 1.91%  |
|                                               | 15-24                  | 658        | 14.25% | 1614        | 12.09% |
|                                               | 25-34                  | 1450       | 31.41% | 4297        | 32.19% |
|                                               | 35-44                  | 930        | 20.15% | 2827        | 21.18% |
|                                               | 45-54                  | 843        | 18.25% | 2586        | 19.37% |
|                                               | 55+                    | 614        | 13.31% | 1770        | 13.26% |
|                                               | <i>Wealth Quintile</i> | Poorest    | 694    | 15.04%      | 2211   |
| Poorer                                        |                        | 820        | 17.77% | 2470        | 18.51% |
| Middle                                        |                        | 828        | 17.94% | 2641        | 19.78% |
| Richer                                        |                        | 1027       | 22.26% | 2842        | 21.29% |
| Richest                                       |                        | 1246       | 26.98% | 3184        | 23.86% |
| <i>Education</i>                              | None/preschool         | 907        | 19.66% | 2741        | 20.56% |
|                                               | Primary                | 2779       | 60.22% | 8371        | 62.78% |
|                                               | Secondary              | 724        | 15.68% | 1663        | 12.47% |
|                                               | Higher                 | 205        | 4.44%  | 559         | 4.20%  |
| <i>Owns livestock, herds, or farm animals</i> | No                     | 2068       | 44.79% | 5829        | 43.67% |
|                                               | Yes                    | 2548       | 55.21% | 7519        | 56.33% |
| <i>Source of drinking water</i>               | Unpipied               | 3912       | 84.79% | 11719       | 87.84% |
|                                               | Piped                  | 702        | 15.21% | 1622        | 12.16% |
| <i>Household bed net</i>                      | No                     | 798        | 17.28% | 2199        | 16.47% |
|                                               | Yes                    | 3818       | 82.72% | 11150       | 83.53% |
| <i>Slept under LLIN last night</i>            | No                     | 1458       | 31.58% | 4101        | 30.72% |
|                                               | Yes                    | 3158       | 68.42% | 9248        | 69.28% |
| <i>Insecticide-treated household net</i>      | No                     | 7          | 0.14%  | 21          | 0.16%  |
|                                               | Yes                    | 3527       | 76.41% | 10414       | 78.02% |
|                                               | Missing data           | 1082       | 23.45% | 2913        | 21.83% |
| <i>1 bed net per 1.8 household members</i>    | No                     | 1905       | 41.37% | 5238        | 39.32% |
|                                               | Yes                    | 2699       | 58.63% | 8084        | 60.68% |

***Cluster level covariates***

| Region        |             | This Study | %      | Overall DHS | %      |
|---------------|-------------|------------|--------|-------------|--------|
| <i>Region</i> | Kigali City | 699        | 15.15% | 1803        | 13.51% |
|               | South       | 1176       | 25.48% | 3248        | 24.33% |
|               | West        | 1026       | 22.23% | 2934        | 21.98% |
|               | North       | 776        | 16.81% | 2121        | 15.89% |

|                                 |           |      |        |       |        |
|---------------------------------|-----------|------|--------|-------|--------|
|                                 | East      | 938  | 20.32% | 3243  | 24.29% |
| <i>Place of residence</i>       | Urban     | 1096 | 23.74% | 2715  | 20.34% |
|                                 | Rural     | 3520 | 76.26% | 10634 | 79.66% |
| <i>Elevation (m)</i>            | 500-1000  | 15   | 0.33%  | 50    | 0.37%  |
|                                 | 1001-1500 | 1263 | 27.37% | 4013  | 30.06% |
|                                 | 1501-2000 | 2450 | 53.07% | 7020  | 52.59% |
|                                 | 2001-2500 | 822  | 17.80% | 2146  | 16.07% |
|                                 | 2500 <    | 66   | 1.43%  | 121   | 0.91%  |
|                                 |           |      |        |       |        |
| <i>Month of data collection</i> | 15-Jan    | 1067 | 23.11% | 3117  | 23.35% |
|                                 | 15-Feb    | 780  | 16.90% | 2432  | 18.22% |
|                                 | 15-Mar    | 1100 | 23.83% | 2872  | 21.52% |
|                                 | 15-Apr    | 32   | 0.70%  | 94    | 0.70%  |
|                                 | 14-Nov    | 457  | 9.90%  | 1884  | 14.11% |
|                                 | 14-Dec    | 1180 | 25.56% | 2950  | 22.10% |

**Supplemental Table 3. District Level Malaria Prevalence at Different Cycle Cutoffs.** The district level weighted prevalence for all malaria, all non-Pf malaria and reach species is shown for a cycle cut off of 45 cycles and 40 cycles.

| <i>District</i> | <i>n</i> | 45 cycles          |               |           |           |           |           | 40 cycles          |               |           |           |           |           |
|-----------------|----------|--------------------|---------------|-----------|-----------|-----------|-----------|--------------------|---------------|-----------|-----------|-----------|-----------|
|                 |          | <i>all malaria</i> | <i>non-Pf</i> | <i>Pf</i> | <i>Pm</i> | <i>Po</i> | <i>Pv</i> | <i>all malaria</i> | <i>non-Pf</i> | <i>Pf</i> | <i>Pm</i> | <i>Po</i> | <i>Pv</i> |
| Bugesera        | 244      | 36.6               | 7.2           | 32.6      | 1.8       | 4.6       | 0.8       | 33.2               | 3.7           | 31.2      | 1.5       | 2.2       | 0.0       |
| Burera          | 117      | 16.0               | 10.9          | 6.1       | 4.5       | 6.4       | 0.0       | 7.1                | 5.7           | 2.4       | 2.7       | 3.0       | 0.0       |
| Gakenke         | 99       | 8.2                | 4.7           | 3.4       | 4.7       | 0.0       | 0.0       | 2.1                | 1.4           | 0.7       | 1.4       | 0.0       | 0.0       |
| Gasabo          | 151      | 16.5               | 4.3           | 12.2      | 0.0       | 4.3       | 0.0       | 8.5                | 0.0           | 8.5       | 0.0       | 0.0       | 0.0       |
| Gatsibo         | 150      | 37.3               | 14.8          | 27.4      | 0.0       | 14.8      | 0.0       | 25.2               | 3.5           | 22.8      | 0.0       | 3.5       | 0.0       |
| Gicumbi         | 104      | 13.3               | 8.1           | 5.2       | 4.8       | 3.3       | 0.0       | 7.3                | 3.8           | 3.5       | 3.8       | 0.0       | 0.0       |
| Gisagara        | 188      | 45.3               | 13.3          | 41.5      | 3.2       | 9.2       | 0.9       | 39.5               | 6.2           | 36.2      | 2.9       | 2.4       | 0.9       |
| Huye            | 151      | 45.0               | 11.2          | 39.8      | 0.2       | 10.9      | 0.0       | 36.0               | 7.6           | 32.5      | 0.0       | 7.6       | 0.0       |
| Kamonyi         | 139      | 25.7               | 7.1           | 21.0      | 0.7       | 6.4       | 0.0       | 19.4               | 1.7           | 18.6      | 0.0       | 1.7       | 0.0       |
| Karongi         | 142      | 13.9               | 9.4           | 5.6       | 1.5       | 7.9       | 0.0       | 7.8                | 3.3           | 5.5       | 1.5       | 1.8       | 0.0       |
| Kayonza         | 211      | 35.1               | 7.3           | 29.1      | 2.2       | 5.1       | 0.0       | 28.9               | 5.4           | 24.3      | 2.2       | 3.1       | 0.0       |
| Kicukiro        | 161      | 12.5               | 6.6           | 7.1       | 3.8       | 2.8       | 0.0       | 8.5                | 4.5           | 4.6       | 3.8       | 0.7       | 0.0       |
| Kirehe          | 281      | 54.8               | 11.6          | 50.8      | 5.3       | 6.3       | 0.0       | 46.4               | 6.7           | 45.6      | 5.0       | 1.6       | 0.0       |
| Muhanga         | 122      | 14.9               | 3.8           | 12.5      | 0.7       | 3.1       | 0.0       | 10.3               | 1.5           | 10.3      | 0.7       | 0.7       | 0.0       |
| Musanze         | 119      | 9.6                | 4.8           | 4.8       | 4.0       | 0.8       | 0.0       | 5.9                | 3.4           | 2.6       | 3.4       | 0.0       | 0.0       |
| Ngoma           | 257      | 56.0               | 21.4          | 46.5      | 6.9       | 14.3      | 0.2       | 45.8               | 11.9          | 41.0      | 6.7       | 5.2       | 0.0       |
| Ngororero       | 100      | 11.2               | 9.1           | 4.0       | 6.2       | 3.0       | 0.0       | 9.1                | 7.0           | 2.9       | 5.1       | 1.9       | 0.0       |
| Nyabihu         | 120      | 9.8                | 6.7           | 3.7       | 3.3       | 2.5       | 1.0       | 4.1                | 3.2           | 1.5       | 2.5       | 0.7       | 0.0       |
| Nyagatare       | 113      | 21.6               | 9.0           | 15.4      | 6.3       | 2.6       | 0.0       | 17.6               | 7.1           | 11.3      | 6.3       | 0.8       | 0.0       |
| Nyamagabe       | 203      | 25.5               | 10.8          | 16.7      | 4.7       | 6.1       | 0.0       | 18.0               | 7.2           | 11.5      | 4.7       | 2.5       | 0.0       |
| Nyamasheke      | 142      | 16.9               | 3.1           | 13.8      | 3.1       | 0.0       | 0.0       | 12.6               | 3.1           | 9.6       | 3.1       | 0.0       | 0.0       |
| Nyanza          | 193      | 56.9               | 9.3           | 54.7      | 4.1       | 5.1       | 0.0       | 52.6               | 6.6           | 50.6      | 3.5       | 3.1       | 0.0       |
| Nyarugenge      | 183      | 19.9               | 11.7          | 9.3       | 3.7       | 7.3       | 0.6       | 7.0                | 2.7           | 5.4       | 1.1       | 1.0       | 0.6       |
| Nyaruguru       | 141      | 24.3               | 9.2           | 20.2      | 3.1       | 6.1       | 0.0       | 18.0               | 5.3           | 15.2      | 3.1       | 2.2       | 0.0       |
| Rubavu          | 105      | 16.5               | 8.1           | 8.5       | 1.8       | 6.3       | 0.0       | 9.7                | 4.1           | 5.6       | 1.8       | 2.3       | 0.0       |
| Ruhango         | 147      | 34.2               | 10.2          | 28.4      | 4.4       | 5.7       | 0.0       | 28.3               | 4.2           | 25.4      | 2.3       | 1.9       | 0.0       |
| Rulindo         | 116      | 10.3               | 2.5           | 7.8       | 0.7       | 1.8       | 0.0       | 8.8                | 1.8           | 7.0       | 0.7       | 1.1       | 0.0       |
| Rusizi          | 165      | 13.9               | 5.6           | 8.7       | 5.6       | 0.0       | 0.0       | 12.1               | 4.9           | 7.7       | 4.9       | 0.0       | 0.0       |
| Rutsiro         | 98       | 12.7               | 7.5           | 7.7       | 5.0       | 1.0       | 1.5       | 9.2                | 6.0           | 3.1       | 5.0       | 1.0       | 0.0       |
| Rwamagana       | 134      | 33.5               | 13.7          | 25.6      | 4.4       | 8.6       | 0.7       | 24.6               | 5.1           | 20.4      | 2.9       | 1.5       | 0.7       |

**Supplemental Table 4. Mixed Species Infection Count.** Weighted and unweighted counts for mono and coinfections, separated by species. Values for both 45 and 40 cycles as a cutoff are included.

|                         |      |
|-------------------------|------|
| <i>unweighted count</i> | 4595 |
| <i>weighted count</i>   | 4616 |

***P. falciparum* infection counts**

|                                   | <i>mono infection</i> | <i>total co-infection</i> | <i>pf_pm</i> | <i>pf_po</i> | <i>pf_pm_po</i> | <i>pf_pm_pv</i> | <b><i>total</i></b> |
|-----------------------------------|-----------------------|---------------------------|--------------|--------------|-----------------|-----------------|---------------------|
| <i>45 cycles unweighted</i>       | 1069                  | 162                       | 56           | 96           | 9.0             | 1.0             | 1231                |
| <i>45 cycles weighted</i>         | 710                   | 103                       | 28           | 69           | 4.7             | 1.2             | 813                 |
| <i>under 40 cycles unweighted</i> | 964                   | 101                       | 50           | 47           | 4.0             | 0.0             | 1065                |
| <i>under 40 cycles weighted</i>   | 604                   | 54                        | 25           | 27           | 1.2             | 0.0             | 658                 |

***P. malariae* infection counts**

|                                   | <i>mono infection</i> | <i>total co-infection</i> | <i>pf_pm</i> | <i>pm_po</i> | <i>pm_pv</i> | <i>pf_pm_po</i> | <i>pf_pm_pv</i> | <b><i>total</i></b> |
|-----------------------------------|-----------------------|---------------------------|--------------|--------------|--------------|-----------------|-----------------|---------------------|
| <i>45 cycles unweighted</i>       | 94                    | 74                        | 56           | 5.0          | 3.0          | 9.0             | 1.0             | 168                 |
| <i>45 cycles weighted</i>         | 109                   | 43                        | 28           | 5.4          | 3.6          | 4.7             | 1.2             | 152                 |
| <i>under 40 cycles unweighted</i> | 84                    | 63                        | 50           | 1.0          | 2.0          | 9.0             | 1.0             | 147                 |
| <i>under 40 cycles weighted</i>   | 95                    | 34                        | 25           | 0.9          | 2.4          | 4.7             | 1.2             | 129                 |

***P. ovale* infection counts**

|                                   | <i>mono infection</i> | <i>total co-infection</i> | <i>pf_po</i> | <i>pm_po</i> | <i>pf_pm_po</i> | <b><i>total</i></b> |
|-----------------------------------|-----------------------|---------------------------|--------------|--------------|-----------------|---------------------|
| <i>45 cycles unweighted</i>       | 136                   | 110                       | 96           | 5.0          | 9.0             | 246                 |
| <i>45 cycles weighted</i>         | 158                   | 79                        | 69           | 5.4          | 4.7             | 237                 |
| <i>under 40 cycles unweighted</i> | 44                    | 57                        | 47           | 1.0          | 9.0             | 101                 |
| <i>under 40 cycles weighted</i>   | 47                    | 33                        | 27           | 0.9          | 4.7             | 79                  |

***P. vivax* infection counts**

|                             | <i>mono infection</i> | <i>total co-infection</i> | <i>pm_pv</i> | <i>pf_pm_pv</i> | <b><i>total</i></b> |
|-----------------------------|-----------------------|---------------------------|--------------|-----------------|---------------------|
| <i>45 cycles unweighted</i> | 3.0                   | 4.0                       | 3.0          | 1.0             | 7.0                 |

|                                   |     |     |     |     |     |
|-----------------------------------|-----|-----|-----|-----|-----|
| <i>45 cycles weighted</i>         | 2.6 | 4.9 | 3.6 | 1.2 | 7.5 |
| <i>under 40 cycles unweighted</i> | 1.0 | 3.0 | 2.0 | 1.0 | 4.0 |
| <i>under 40 cycles weighted</i>   | 1.0 | 3.6 | 2.4 | 1.2 | 4.6 |

**All malaria counts**

|                                     | <i>mono infection</i> | <i>co-infection</i> | <i>total Pf</i> | <i>total Pm</i> | <i>total Po</i> | <i>total Pv</i> | <i>total non-pf</i> | <b><i>total</i></b> |
|-------------------------------------|-----------------------|---------------------|-----------------|-----------------|-----------------|-----------------|---------------------|---------------------|
| <i>unweighted count</i>             | 1302.0                | 350                 | 1231            | 168             | 246             | 7.0             | 421.0               | 1652.0              |
| <i>weighted count</i>               | 979                   | 230                 | 813             | 152             | 237             | 7               | 396                 | 1209                |
| <i>under 40 CT unweighted count</i> | 1092                  | 224.0               | 1019            | 128             | 93              | 4.0             | 225.0               | 1244.0              |
| <i>weighted under 40 count</i>      | 746                   | 125                 | 658             | 129             | 79              | 5               | 213                 | 871                 |
